# Supplementary material
Source: publisher figshare collection journal article supplement (https://acs.figshare.com/ndownloader/files/3739843)
Supplement: Supplementary file 1 [file 3739843]

## SUPPORTING INFORMATION

### Activity-independent discovery of secondary metabolites using chemical elicitation and cheminformatic inference

Sheila M. Pimentel-Elardo<sup>1</sup>, Dan Sørensen<sup>2</sup>, Louis Ho<sup>1</sup>, Mikaela Ziko<sup>3</sup>, Stephanie A. Bueler<sup>4</sup>, Stella Lu<sup>5</sup>, Joe Tao<sup>6</sup>, Arvin Moser<sup>7</sup>, Richard Lee<sup>7</sup>, David Agard<sup>6</sup>, Greg Fairn<sup>5</sup>, John L. Rubinstein<sup>1,4</sup>, Brian K. Shoichet<sup>8</sup>, Justin R. Nodwell<sup>1,\*</sup>

\*Corresponding author: justin.nodwell@utoronto.ca

#### Contents

**Methods.** Supporting Experimental Procedures

**Figure S1.** Germicidin A (germ A) and germicidin B/C (germ B/C) and desferrioxamine B (des B) and desferrioxamine E (des E) are commonly induced by CI-ARC in 21 out of 50 strains.

**Figure S2.** Dose-dependence of oxohygrolidin yields on CI-ARC. Stepwise increases of oxohygrolidin produced by *S. ghanaensis* were observed by increasing amounts of CI-ARC compared with DMSO.

**Figure S3.** Crude extracts from WAC strains showing more antifungal than antibacterial activities. A total of 400 extracts were tested by disk diffusion assay against *S. cerevisiae*, *B. subtilis* and *E. coli*.

**Figure S4.** SEA predictions for oxohygrolidin for the vacuolar ATPase using ChEMBL20.

**Table S1:** List of masses (base peak ions) of compounds induced by CI-ARC

**Table S2:** <sup>13</sup>C (176.08 MHz) and <sup>1</sup>H NMR (700.17 MHz) data of oxohygrolidin in DMSO-*d*<sub>6</sub>

**Table S3:** <sup>13</sup>C (176.08 MHz) and <sup>1</sup>H NMR (700.17 MHz) data of 9-methylstreptimidone in DMSO-*d*<sub>6</sub>

**Table S4:** <sup>13</sup>C (176.08 MHz) and <sup>1</sup>H NMR (700.17 MHz) data of dinactin in DMSO-*d*<sub>6</sub>

**Table S5.** List of genes and their functions in *S. cerevisiae*

## METHODS

### Bacterial strains, culture conditions and compounds

Fifty strains were used for screening with CI-ARC: 40 strains from the Wright Actinomycete Collection (WAC), as described by Thaker *et al.* (1); and ten sequenced strains: *Streptomyces clavuligerus* ATCC 27064, *S. ghanaensis* ATCC 14672, *S. griseoflavus* Tü 4000, *S. hygrosopicus* ATCC 53653, *S. roseosporus* NRRL 15998, *Amycolatopsis* sp. AA4, *Streptomyces* sp. Mg1, *S. sviveus* ATCC 29083, *S. viridochromogenes* DSM 40736 and *Kutzneria* sp. 744. Strains were grown on the following solid media for 7 days at 30°C: R5M (100.0 g maltose, 10.12 g  $\text{MgCl}_2 \cdot \text{H}_2\text{O}$ , 0.5 g  $\text{K}_2\text{SO}_4$ , 0.2 g Difco Casamino acids, 10.0 g yeast extract, 11.46 g TES, 4 ml trace elements, 10.0 ml 0.5%  $\text{K}_2\text{PO}_4$ , 4.0 ml [5M]  $\text{CaCl}_2 \cdot 2\text{H}_2\text{O}$ , 15.0 ml [20%] L-proline, 7.0 ml [1 M] NaOH per liter); MYM (4.0 g maltose, 4.0 g yeast extract, 10.0 g malt extract, 2.0 ml trace elements per liter), MS (20.0 g soy flour, 20.0 g mannitol, 10.0 ml [1 M]  $\text{MgCl}_2 \cdot 6\text{H}_2\text{O}$  per liter), R2YE (103.0 g sucrose, 10.0 g glucose, 0.25 g  $\text{K}_2\text{SO}_4$ , 10.12 g  $\text{MgCl}_2 \cdot 6\text{H}_2\text{O}$ , 0.1 g Difco Casamino acids, 5.0 g yeast extract, 5.73 g TES, 2.0 ml trace elements, 10.0 ml [0.5%]  $\text{K}_2\text{PO}_4$ , 4.0 ml [5 M]  $\text{CaCl}_2 \cdot 2\text{H}_2\text{O}$ , 15.0 ml [20%] L-proline, 5.0 ml [1 M] NaOH per liter) and SAM (15.0 g of dextrose, 15.0 g peptone, 5.0 g NaCl, 1.0 g yeast extract, 2.5 ml glycerol per liter).

### Comparative metabolite profiling by LC-MS analysis

Cultures growing on solid media were cut in small pieces, extracted in equal volume of *n*-butanol, sonicated for 15 min and macerated overnight. Extracts were then filtered through Whatman paper, evaporated to dryness (Genevac) and resuspended in 1:1  $\text{CH}_3\text{CN}:\text{H}_2\text{O}$ . LC-MS analysis was performed on an Agilent 1200 series LC system coupled to a Bruker micrOTOF II with an electrospray ionization source. LC conditions were as follows: Phenomenex Kinetex C18 column (2.1 x 50 mm, 2.6  $\mu\text{m}$ , 100 Å°); solvents  $\text{H}_2\text{O}$  with 0.1% formic acid (A), and  $\text{CH}_3\text{CN}$  with 0.1% formic acid (B), 40°C column temperature, flow rate of 0.2 mL/min and the following gradient: 0.5 min 5% B, 5–9 min 95% B, 10–15 min 5% B. The MS conditions were set to a capillary voltage of 4.5 kV for positive mode, nebulizing gas pressure of 3 barr, dry gas flow rate ( $\text{N}_2$ ) of 6 L/min and temperature at 200°C.

### **Isolation, purification and structure elucidation of compounds**

*S. ghanaensis* ATCC 14672, *S. hygroscopicus* ATCC 53653 and WAC0256 were inoculated in 1 L of MYM agar, grown for 7 days at 30°C and extracted twice with *n*-butanol and evaporated to dryness. The crude extracts were subjected to pre-fractionation with Strata-X reversed phase cartridge (Phenomenex) using H<sub>2</sub>O/CH<sub>3</sub>CN gradient: 100% (FW), 75%:25% (F1), 50%:50% (F2), 25%:75% (F3) followed by 100% CH<sub>3</sub>CN (F4). The resulting fractions F2, F3 and F4 which contained 9-methylstreptimidone, oxohygroolidin and the macrotetrolide series, respectively, were purified by semi-preparative HPLC (Waters XSelect CSH C18, 10 x 150 mm, 5 µm) using an Alliance 2695 HPLC series (Waters, USA). 9-methylstreptimidone eluted at 55% CH<sub>3</sub>CN in water (0.1% formic acid) to yield ~8 mg of pure compound. Oxohygroolidin eluted at 80% CH<sub>3</sub>CN in water (0.1% formic acid) to give ~5 mg of pure compound. The macrotetrolides eluted at 100% CH<sub>3</sub>CN (0.1% formic acid) with yields of ~1 mg each of nonactin, monactin, dinactin and trinactin.

### **Chemical-genetic profiling in yeast**

A library of *S. cerevisiae* haploid deletion mutants (4,309 strains) from BY4741 (*MATa his3Δ1 leu2Δ0 ura3Δ0 met15Δ0*) were replicated from 384-agar arrays using a pin-replicator tool (V&P Scientific) onto YEPD agar plates (40 mg adenine, 40 mg tryptophan, 20 g peptone, 10 g yeast extract, 40 ml [50%] glucose, 1 ml [200mg/l] G-418 per liter) with either DMSO or oxohygroolidin (16 µg/ml) and incubated at 30°C for two days. Strains that showed hypersensitivity to oxohygroolidin were further tested by serial spot dilution assay. Strains were grown overnight in YEPD and the cultures were adjusted to OD 0.1 at 600 nm and diluted 10-fold. Three microliters of the dilutions were spotted onto YEPD plates containing DMSO or 16 µg/ml oxohygroolidin and incubated at 30°C for two days.

### **V-ATPase inhibition assay**

V-ATPase (2 µl) was added to 160 µl total volume of 50 mM HEPES (pH 8.0), 3 mM MgCl<sub>2</sub>, 0.1 % (w/v) dodecyl maltoside (Anatrace), 0.2 mM NADH, 20 units/ml pyruvate kinase, 50 units/ml L-lactic dehydrogenase, 1 mM phosphoenolpyruvate, and 2 mM ATP. The loss of NADH at 340 nm was recorded over 200 s in a SpectraMax M2 microplate reader (Molecular

Devices). 1 mM stock solutions of oxohygrolydin, bafilomycin A1 and concanamycin A were prepared in DMSO. The solvent, DMSO was added at the same concentration to the reaction mixture across all samples, with or without inhibitor. ATPase assays were repeated in triplicate and rates were determined by taking the slope of the linear region of the absorbance versus time plot for each sample.

### **LysoTracker Red staining assay**

HeLa cells grown on coverslips were treated with oxohygrolydin in serum free DMEM for 30 min at 37°C. Cells were placed in HEPES-buffered solution HPMI with oxohygrolydin and pre-equilibrated without CO<sub>2</sub> for 10 min. Cells were treated with concanamycin A (Sigma) for 30 min at 37°C with a final concentration of 500 nM. Cells were stained with LysoTracker Red DND-99 at 1:5000 dilutions for 10 min at 37°C. Coverslips were washed three times and imaged immediately on an Axiovert 200M spinning disc confocal microscope (Carl Zeiss) using a 63x (NA 1.4) oil immersion objective lens. Images were captured with a back-thinned, electron-multiplied camera (C9100-13 ImagEM; Hamamatsu Photonics) using Volocity software (PerkinElmer) and LysoTracker Red was visualized using a diode-pump solid-state laser at 561 nm (Spectral Applied Sciences). Post-acquisition cells were selected using the region of interest (ROI) tool in Volocity and the total fluorescence/cell was determined. ROIs of equivalent size outside of the cell were used to subtract the background fluorescence. The majority of the fluorescence signal was due to accumulation in the lysosomes. Upon their neutralization, the signal is largely reduced.

### **HSP90 ATPase assay**

Human Hsp90 $\alpha$  (5  $\mu$ M) was pre-incubated with the compounds at 200  $\mu$ M, 100  $\mu$ M or 50  $\mu$ M or radicicol (50  $\mu$ M) at 30 °C for ten minutes. The DMSO concentration in all reactions was normalized to 2%. After the incubation, 0.1 mM NADH (CalBiochem), 50 U/ml L-lactate dehydrogenase (CalBiochem), 1 mM phosphoenolpyruvate (Sigma) and 50 U/ml pyruvate kinase (Sigma) were added to the Hsp90 $\alpha$ /compound mix. The reaction was initiated by adding 1 mM ATP (Sigma). The decline of NADH absorbance at 340 nm is measured in a 384-well plate (Greiner) on a microplate reader (SpectraMax M5, Molecular Devices) at 30°C.

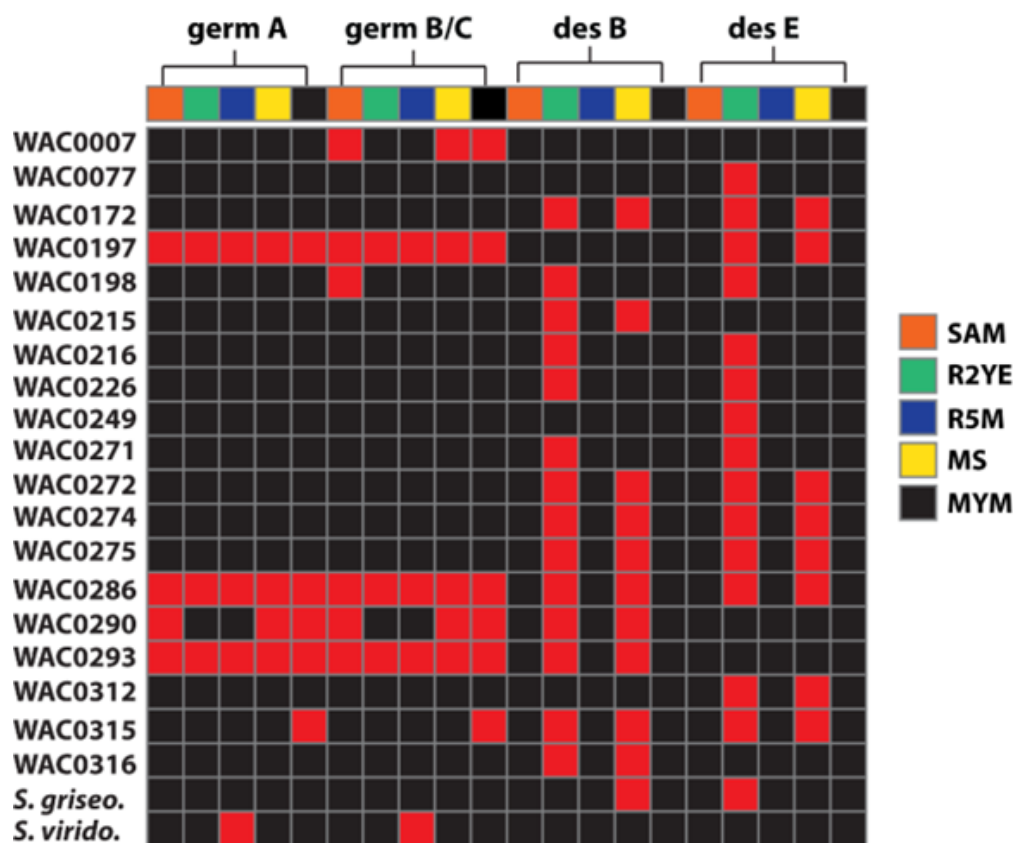

**Figure S1.** Germicidin A (germ A) and germicidin B/C (germ B/C) and desferrioxamine B (des B) and desferrioxamine E (des E) are commonly induced by CI-ARC in 21 out of 50 strains.

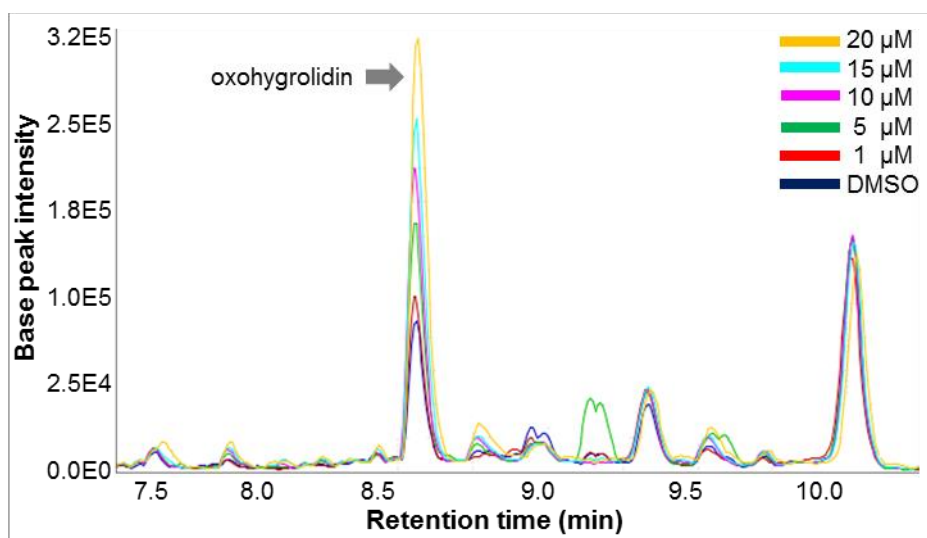

**Figure S2.** Dose-dependence of oxohydrogrolidin yields on Cl-ARC. Stepwise increases of oxohydrogrolidin produced by *S. ghanaensis* were observed by increasing amounts of Cl-ARC compared with DMSO.

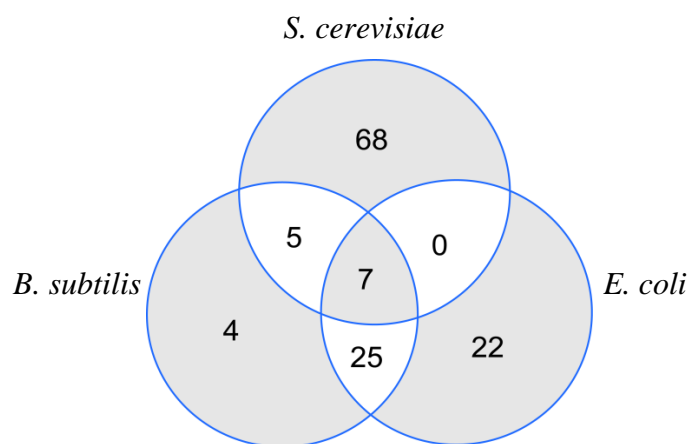

**Figure S3.** Crude extracts from WAC strains showing more antifungal than antibacterial activities. A total of 400 extracts were tested by disk diffusion assay against *S. cerevisiae*, *B. subtilis* and *E. coli*.

A

| Query Molecule & ID                                                                                 | Target Name      | Target Key       | Group | Description      | P-Value    | MaxTC |
|-----------------------------------------------------------------------------------------------------|------------------|------------------|-------|------------------|------------|-------|
| <br>oxohygroloidin | VAS1_HUMAN-all   | VAS1_HUMAN-all   | all   | VAS1_HUMAN-all   | 9.957e-138 | 0.74  |
|                                                                                                     | VAS1_HUMAN-other | VAS1_HUMAN-other | all   | VAS1_HUMAN-other | 2.017e-136 | 0.74  |
|                                                                                                     | VAS1_HUMAN-ic50  | VAS1_HUMAN-ic50  | all   | VAS1_HUMAN-ic50  | 3.532e-81  | 0.64  |

### VAS1\_HUMAN-ic50

#### Reference Set (12 Compounds)

B

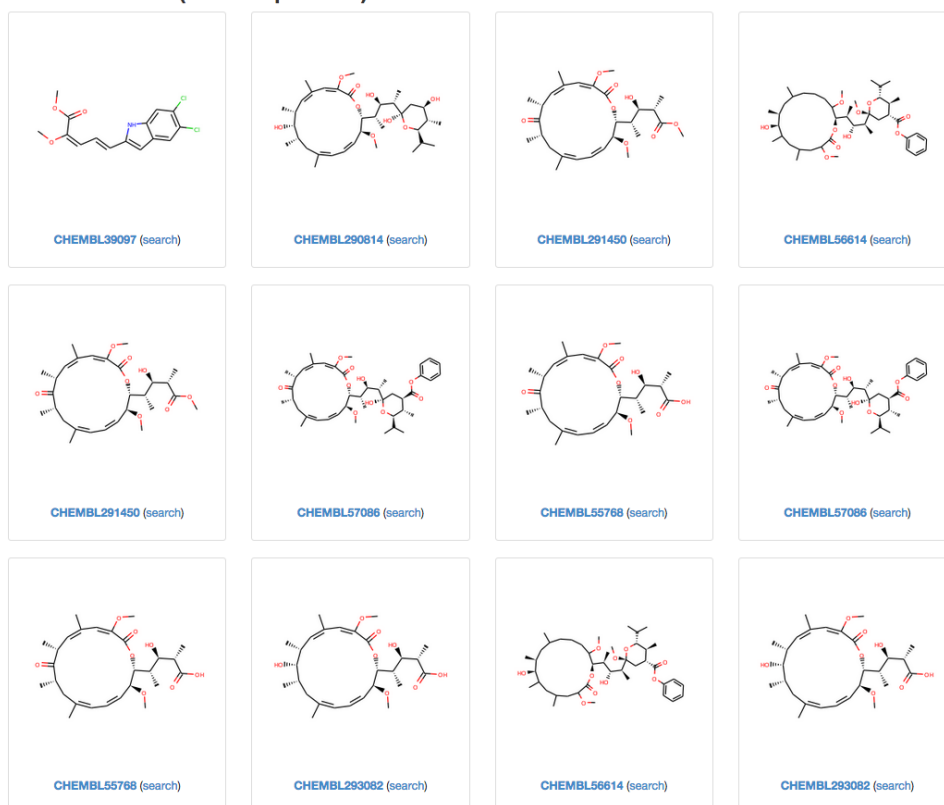

**Figure S4. SEA predictions for oxohygroloidin for the vacuolar ATPase using ChEMBL20.**

(A) Here, P-values rather than E-values are represented. MaxTC is the Tanimoto Coefficient of the most similar V1-ATPase ligand in ChEMBL to oxohygroloidin, using ECFP4 fingerprints. The ligands are represented as several different subsets from ChEMBL, including only those with reported IC<sub>50</sub> values and all ligands reported in the literature. (B) A view of the ChEMBL V1-ATPase ligands to which oxohygroloidin was compared. Bafilomycin A1 is shown in the first row, second from left.

**Table S1:** List of masses (base peak ions) of compounds induced by Cl-ARC

| <i>m/z</i> | Strain  | Media | Ionization mode | Retention Time (min) | Compound          |
|------------|---------|-------|-----------------|----------------------|-------------------|
| 183.10     | WAC007  | MS    | positive        | 7.3                  | germicidin B/C    |
| 183.10     | WAC007  | MYM   | positive        | 7.3                  | germicidin B/C    |
| 183.10     | WAC007  | SAM   | positive        | 7.3                  | germicidin B/C    |
| 197.12     | WAC007  | MS    | positive        | 7.5                  |                   |
| 197.12     | WAC007  | MYM   | positive        | 7.5                  | germicidin A      |
| 197.12     | WAC007  | SAM   | positive        | 7.5                  | germicidin A      |
| 601.37     | WAC0077 | R2YE  | positive        | 6.5                  | desferrioxamine E |
| 897.42     | WAC0077 | MYM   | positive        | 8.2                  |                   |
| 1103.44    | WAC0077 | MYM   | negative        | 7.7                  |                   |
| 427.30     | WAC0165 | SAM   | positive        | 6.8                  |                   |
| 614.33     | WAC0165 | SAM   | positive        | 7.1                  |                   |
| 796.30     | WAC0165 | MYM   | positive        | 7.0                  |                   |
| 754.49     | WAC0171 | MYM   | positive        | 10.7                 | nonactin          |
| 754.49     | WAC0171 | SAM   | positive        | 10.7                 | nonactin          |
| 754.49     | WAC0171 | R5M   | positive        | 10.7                 | nonactin          |
| 754.49     | WAC0171 | MS    | positive        | 10.7                 | nonactin          |
| 754.49     | WAC0171 | R2YE  | positive        | 10.7                 | nonactin          |
| 768.50     | WAC0171 | MYM   | positive        | 11.2                 | monactin          |
| 768.50     | WAC0171 | SAM   | positive        | 11.2                 | monactin          |
| 768.50     | WAC0171 | R5M   | positive        | 11.2                 | monactin          |
| 768.50     | WAC0171 | MS    | positive        | 11.2                 | monactin          |
| 768.50     | WAC0171 | R2YE  | positive        | 11.2                 | monactin          |
| 782.52     | WAC0171 | MYM   | positive        | 11.7                 | dinactin          |
| 782.52     | WAC0171 | SAM   | positive        | 11.7                 | dinactin          |
| 782.52     | WAC0171 | R5M   | positive        | 11.7                 | dinactin          |
| 782.52     | WAC0171 | MS    | positive        | 11.7                 | dinactin          |
| 782.52     | WAC0171 | R2YE  | positive        | 11.7                 | dinactin          |
| 561.37     | WAC0172 | R2YE  | positive        | 6.3                  | desferrioxamine B |
| 561.37     | WAC0172 | MS    | positive        | 6.3                  | desferrioxamine B |
| 601.37     | WAC0172 | R2YE  | positive        | 6.5                  | desferrioxamine E |
| 601.37     | WAC0172 | MS    | positive        | 6.5                  | desferrioxamine E |
| 754.49     | WAC0172 | R5M   | positive        | 10.7                 | monactin          |
| 768.50     | WAC0172 | R5M   | positive        | 11.2                 | monactin          |
| 782.52     | WAC0172 | R5M   | positive        | 11.7                 | dinactin          |
| 199.17     | WAC0193 | R2YE  | positive        | 8.4                  | germicidin E      |
| 213.18     | WAC0193 | R2YE  | positive        | 8.7                  | germicidin D      |
| 243.24     | WAC0195 | R5M   | positive        | 10.0                 |                   |



| <i>m/z</i> | Strain  | Media | Ionization mode | Retention Time (min) | Compound          |
|------------|---------|-------|-----------------|----------------------|-------------------|
| 243.24     | WAC0195 | MYM   | positive        | 10.0                 |                   |
| 345.30     | WAC0195 | MYM   | positive        | 10.3                 |                   |
| 183.10     | WAC0197 | SAM   | positive        | 7.3                  | germicidin B/C    |
| 183.10     | WAC0197 | R2YE  | positive        | 7.3                  | germicidin B/C    |
| 183.10     | WAC0197 | R5M   | positive        | 7.3                  | germicidin B/C    |
| 183.10     | WAC0197 | MS    | positive        | 7.3                  | germicidin B/C    |
| 183.10     | WAC0197 | MYM   | positive        | 7.3                  | germicidin B/C    |
| 197.12     | WAC0197 | SAM   | positive        | 7.5                  | germicidin A      |
| 197.12     | WAC0197 | R2YE  | positive        | 7.5                  | germicidin A      |
| 197.12     | WAC0197 | R5M   | positive        | 7.5                  | germicidin A      |
| 197.12     | WAC0197 | MS    | positive        | 7.5                  | germicidin A      |
| 197.12     | WAC0197 | MYM   | positive        | 7.5                  | germicidin A      |
| 229.22     | WAC0197 | SAM   | positive        | 9.6                  |                   |
| 243.24     | WAC0197 | SAM   | positive        | 10.0                 |                   |
| 243.24     | WAC0197 | SAM   | positive        | 10.0                 |                   |
| 243.24     | WAC0197 | R2YE  | positive        | 10.0                 |                   |
| 345.30     | WAC0197 | SAM   | positive        | 10.3                 |                   |
| 571.29     | WAC0197 | SAM   | negative        | 8.8                  |                   |
| 585.31     | WAC0197 | SAM   | negative        | 9.3                  |                   |
| 601.37     | WAC0197 | R2YE  | positive        | 6.5                  | desferrioxamine E |
| 601.37     | WAC0197 | MS    | positive        | 6.5                  | desferrioxamine E |
| 183.10     | WAC0198 | SAM   | positive        | 7.3                  | germicidin B/C    |
| 197.12     | WAC0198 | SAM   | positive        | 7.5                  | germicidin A      |
| 561.37     | WAC0198 | R2YE  | positive        | 6.3                  | desferrioxamine B |
| 601.37     | WAC0198 | R2YE  | positive        | 6.5                  | desferrioxamine E |
| 254.13     | WAC0210 | SAM   | positive        | 8.3                  |                   |
| 268.10     | WAC0210 | SAM   | negative        | 7.8                  |                   |
| 561.37     | WAC0215 | R2YE  | positive        | 6.3                  | desferrioxamine B |
| 561.37     | WAC0215 | MS    | positive        | 6.3                  | desferrioxamine B |
| 363.19     | WAC0216 | R2YE  | positive        | 7.7                  |                   |
| 380.19     | WAC0216 | R2YE  | positive        | 7.5                  |                   |
| 561.37     | WAC0216 | R2YE  | positive        | 6.3                  | desferrioxamine B |
| 601.37     | WAC0216 | R2YE  | positive        | 6.5                  | desferrioxamine E |
| 243.24     | WAC0226 | MYM   | positive        | 10.0                 |                   |
| 271.27     | WAC0226 | MYM   | positive        | 10.0                 |                   |
| 303.24     | WAC0226 | MS    | positive        | 10.0                 | linoleic acid     |
| 317.27     | WAC0226 | MYM   | positive        | 9.3                  |                   |
| 345.30     | WAC0226 | MYM   | positive        | 10.3                 |                   |
| 561.37     | WAC0226 | R2YE  | positive        | 6.3                  | desferrioxamine B |

| <i>m/z</i> | Strain  | Media | Ionization mode | Retention Time (min) | Compound          |
|------------|---------|-------|-----------------|----------------------|-------------------|
| 601.37     | WAC0226 | R2YE  | positive        | 6.5                  | desferrioxamine E |
| 866.47     | WAC0226 | MS    | positive        | 8.6                  |                   |
| 897.42     | WAC0226 | MYM   | positive        | 8.2                  |                   |
| 1072.63    | WAC0226 | MS    | positive        | 11.7                 |                   |
| 923.56     | WAC0236 | MYM   | negative        | 11.3                 |                   |
| 937.58     | WAC0236 | MYM   | negative        | 11.9                 |                   |
| 934.54     | WAC0243 | R2YE  | positive        | 8.5                  |                   |
| 948.55     | WAC0243 | R2YE  | positive        | 8.7                  |                   |
| 601.37     | WAC0249 | R2YE  | positive        | 6.5                  | desferrioxamine E |
| 897.42     | WAC0249 | SAM   | positive        | 8.2                  |                   |
| 897.42     | WAC0249 | MYM   | positive        | 8.2                  |                   |
| 754.49     | WAC0256 | MYM   | positive        | 10.7                 | nonactin          |
| 754.49     | WAC0256 | SAM   | positive        | 10.7                 | nonactin          |
| 754.49     | WAC0256 | R5M   | positive        | 10.7                 | nonactin          |
| 754.49     | WAC0256 | MS    | positive        | 10.7                 | nonactin          |
| 754.49     | WAC0256 | R2YE  | positive        | 10.7                 | nonactin          |
| 768.50     | WAC0256 | MYM   | positive        | 11.2                 | monactin          |
| 768.50     | WAC0256 | SAM   | positive        | 11.2                 | monactin          |
| 768.50     | WAC0256 | R5M   | positive        | 11.2                 | monactin          |
| 768.50     | WAC0256 | MS    | positive        | 11.2                 | monactin          |
| 768.50     | WAC0256 | R2YE  | positive        | 11.2                 | monactin          |
| 782.52     | WAC0256 | MYM   | positive        | 11.7                 | dinactin          |
| 782.52     | WAC0256 | SAM   | positive        | 11.7                 | dinactin          |
| 782.52     | WAC0256 | R5M   | positive        | 11.7                 | dinactin          |
| 782.52     | WAC0256 | MS    | positive        | 11.7                 | dinactin          |
| 782.52     | WAC0256 | R2YE  | positive        | 11.7                 | dinactin          |
| 897.42     | WAC0256 | MYM   | positive        | 8.2                  |                   |
| 754.49     | WAC0269 | MYM   | positive        | 10.7                 | nonactin          |
| 768.50     | WAC0269 | MYM   | positive        | 11.2                 | monactin          |
| 782.52     | WAC0269 | MYM   | positive        | 11.7                 | dinactin          |
| 561.37     | WAC0271 | R2YE  | positive        | 6.3                  | desferrioxamine B |
| 601.37     | WAC0271 | R2YE  | positive        | 6.5                  | desferrioxamine E |
| 243.24     | WAC0272 | MYM   | positive        | 10.0                 |                   |
| 561.37     | WAC0272 | R2YE  | positive        | 6.3                  | desferrioxamine B |
| 561.37     | WAC0272 | MS    | positive        | 6.3                  | desferrioxamine B |
| 601.37     | WAC0272 | R2YE  | positive        | 6.5                  | desferrioxamine E |
| 601.37     | WAC0272 | MS    | positive        | 6.5                  | desferrioxamine E |
| 897.42     | WAC0272 | R2YE  | positive        | 8.2                  |                   |
| 561.37     | WAC0274 | R2YE  | positive        | 6.3                  | desferrioxamine B |

| <i>m/z</i> | Strain  | Media | Ionization mode | Retention Time (min) | Compound          |
|------------|---------|-------|-----------------|----------------------|-------------------|
| 561.37     | WAC0274 | MS    | positive        | 6.3                  | desferrioxamine B |
| 601.37     | WAC0274 | MS    | positive        | 6.5                  | desferrioxamine E |
| 601.37     | WAC0274 | R2YE  | positive        | 6.5                  | desferrioxamine E |
| 561.37     | WAC0275 | R2YE  | positive        | 6.3                  | desferrioxamine B |
| 561.37     | WAC0275 | MS    | positive        | 6.3                  | desferrioxamine B |
| 601.37     | WAC0275 | MS    | positive        | 6.5                  | desferrioxamine E |
| 601.37     | WAC0275 | R2YE  | positive        | 6.5                  | desferrioxamine E |
| 183.10     | WAC0286 | SAM   | positive        | 7.3                  | germicidin B/C    |
| 183.10     | WAC0286 | R2YE  | positive        | 7.3                  | germicidin B/C    |
| 183.10     | WAC0286 | R5M   | positive        | 7.3                  | germicidin B/C    |
| 183.10     | WAC0286 | MS    | positive        | 7.3                  | germicidin B/C    |
| 183.10     | WAC0286 | MYM   | positive        | 7.3                  | germicidin B/C    |
| 197.12     | WAC0286 | SAM   | positive        | 7.5                  | germicidin A      |
| 197.12     | WAC0286 | R2YE  | positive        | 7.5                  | germicidin A      |
| 197.12     | WAC0286 | R5M   | positive        | 7.5                  | germicidin A      |
| 197.12     | WAC0286 | MS    | positive        | 7.5                  | germicidin A      |
| 197.12     | WAC0286 | MYM   | positive        | 7.5                  | germicidin A      |
| 561.37     | WAC0286 | R2YE  | positive        | 6.3                  | desferrioxamine B |
| 561.37     | WAC0286 | MS    | positive        | 6.3                  | desferrioxamine B |
| 601.37     | WAC0286 | R2YE  | positive        | 6.5                  | desferrioxamine E |
| 601.37     | WAC0286 | MS    | positive        | 6.5                  | desferrioxamine E |
| 1058.57    | WAC0286 | MS    | positive        | 8.3                  |                   |
| 243.24     | WAC0287 | MYM   | positive        | 10.0                 |                   |
| 247.12     | WAC0287 | MYM   | positive        | 9.9                  |                   |
| 183.10     | WAC0290 | MYM   | positive        | 7.3                  | germicidin B/C    |
| 183.10     | WAC0290 | MS    | positive        | 7.3                  | germicidin B/C    |
| 183.10     | WAC0290 | SAM   | positive        | 7.3                  | germicidin B/C    |
| 197.12     | WAC0290 | MYM   | positive        | 7.5                  | germicidin A      |
| 197.12     | WAC0290 | MS    | positive        | 7.5                  | germicidin A      |
| 197.12     | WAC0290 | SAM   | positive        | 7.5                  | germicidin A      |
| 199.17     | WAC0290 | MYM   | positive        | 8.4                  | germicidin E      |
| 199.17     | WAC0290 | MS    | positive        | 8.4                  | germicidin E      |
| 213.18     | WAC0290 | MYM   | positive        | 8.7                  | germicidin D      |
| 213.18     | WAC0290 | MS    | positive        | 8.7                  | germicidin D      |
| 561.37     | WAC0290 | MS    | positive        | 6.3                  | desferrioxamine B |
| 561.37     | WAC0290 | R2YE  | positive        | 6.3                  | desferrioxamine B |
| 897.42     | WAC0290 | MYM   | positive        | 8.2                  |                   |
| 183.10     | WAC0293 | SAM   | positive        | 7.3                  | germicidin B/C    |
| 183.10     | WAC0293 | R5M   | positive        | 7.3                  | germicidin B/C    |

| <i>m/z</i> | Strain  | Media | Ionization mode | Retention Time (min) | Compound          |
|------------|---------|-------|-----------------|----------------------|-------------------|
| 183.10     | WAC0293 | MS    | positive        | 7.3                  | germicidin B/C    |
| 183.10     | WAC0293 | MYM   | positive        | 7.3                  | germicidin B/C    |
| 197.12     | WAC0293 | SAM   | positive        | 7.5                  | germicidin A      |
| 197.12     | WAC0293 | R5M   | positive        | 7.5                  | germicidin A      |
| 197.12     | WAC0293 | MS    | positive        | 7.5                  | germicidin A      |
| 197.12     | WAC0293 | MYM   | positive        | 7.5                  | germicidin A      |
| 199.17     | WAC0293 | SAM   | positive        | 8.4                  | germicidin E      |
| 213.18     | WAC0293 | SAM   | positive        | 8.7                  | germicidin D      |
| 243.24     | WAC0293 | R5M   | positive        | 10.0                 |                   |
| 317.27     | WAC0293 | R5M   | positive        | 9.3                  |                   |
| 343.27     | WAC0293 | R5M   | positive        | 10.0                 |                   |
| 353.29     | WAC0293 | R5M   | positive        | 10.0                 |                   |
| 561.37     | WAC0293 | R2YE  | positive        | 6.3                  | desferrioxamine B |
| 561.37     | WAC0293 | MS    | positive        | 6.3                  | desferrioxamine B |
| 897.42     | WAC0293 | R5M   | positive        | 8.2                  |                   |
| 427.30     | WAC0295 | SAM   | positive        | 6.8                  |                   |
| 427.30     | WAC0295 | R2YE  | positive        | 6.8                  |                   |
| 427.30     | WAC0295 | R5M   | positive        | 6.8                  |                   |
| 614.33     | WAC0295 | SAM   | positive        | 7.1                  |                   |
| 614.33     | WAC0295 | R2YE  | positive        | 7.1                  |                   |
| 614.33     | WAC0295 | R5M   | positive        | 7.1                  |                   |
| 253.06     | WAC0312 | SAM   | negative        | 7.1                  |                   |
| 313.17     | WAC0312 | SAM   | negative        | 7.6                  |                   |
| 468.21     | WAC0312 | SAM   | negative        | 7.7                  |                   |
| 504.24     | WAC0312 | SAM   | negative        | 7.4                  |                   |
| 601.37     | WAC0312 | R2YE  | positive        | 6.5                  | desferrioxamine E |
| 601.37     | WAC0312 | MS    | positive        | 6.5                  | desferrioxamine E |
| 183.10     | WAC0315 | MYM   | positive        | 7.3                  | germicidin B/C    |
| 197.12     | WAC0315 | MYM   | positive        | 7.5                  | germicidin A      |
| 199.17     | WAC0315 | MYM   | positive        | 8.4                  | germicidin E      |
| 213.18     | WAC0315 | MYM   | positive        | 8.7                  | germicidin D      |
| 419.24     | WAC0315 | MYM   | positive        | 9.9                  |                   |
| 561.37     | WAC0315 | R2YE  | positive        | 6.3                  | desferrioxamine B |
| 561.37     | WAC0315 | MS    | positive        | 6.3                  | desferrioxamine B |
| 601.37     | WAC0315 | R2YE  | positive        | 6.5                  | desferrioxamine E |
| 601.37     | WAC0315 | MS    | positive        | 6.5                  | desferrioxamine E |
| 199.17     | WAC0316 | R2YE  | positive        | 8.4                  | germicidin E      |
| 199.17     | WAC0316 | MS    | positive        | 8.4                  | germicidin E      |
| 213.18     | WAC0316 | R2YE  | positive        | 8.7                  | germicidin D      |

| <i>m/z</i> | Strain                      | Media | Ionization mode | Retention Time (min) | Compound              |
|------------|-----------------------------|-------|-----------------|----------------------|-----------------------|
| 213.18     | WAC0316                     | MS    | positive        | 8.7                  | germicidin D          |
| 427.30     | WAC0316                     | SAM   | positive        | 6.8                  |                       |
| 427.30     | WAC0316                     | R2YE  | positive        | 6.8                  |                       |
| 561.37     | WAC0316                     | R2YE  | positive        | 6.3                  | desferrioxamine B     |
| 561.37     | WAC0316                     | MS    | positive        | 6.3                  | desferrioxamine B     |
| 614.33     | WAC0316                     | SAM   | positive        | 7.1                  |                       |
| 614.33     | WAC0316                     | R2YE  | positive        | 7.1                  |                       |
| 427.30     | WAC04659                    | R5M   | positive        | 6.8                  |                       |
| 614.33     | WAC04659                    | R5M   | positive        | 7.1                  |                       |
| 923.56     | WAC04741                    | R2YE  | negative        | 11.3                 |                       |
| 937.58     | WAC04741                    | R2YE  | negative        | 11.9                 |                       |
| 373.24     | <i>S. ghanaensis</i>        | MYM   | positive        | 9.3                  |                       |
| 543.37     | <i>S. ghanaensis</i>        | MYM   | positive        | 8.6                  | oxohygrolicidin       |
| 561.37     | <i>S. griseoflavus</i>      | MS    | positive        | 6.3                  | desferrioxamine B     |
| 306.17     | <i>S. hygroscopicus</i>     | MYM   | positive        | 7.0                  |                       |
| 308.17     | <i>S. hygroscopicus</i>     | MYM   | positive        | 7.3                  | 9-methylstreptimidone |
| 243.24     | <i>S. roseosporus</i>       | MYM   | positive        | 10.0                 |                       |
| 839.46     | <i>S. roseosporus</i>       | MYM   | positive        | 8.0                  | arylomycin            |
| 335.22     | <i>S. sp. Mg1</i>           | R5M   | positive        | 8.1                  |                       |
| 923.56     | <i>S. sp. Mg1</i>           | MYM   | negative        | 11.3                 |                       |
| 937.58     | <i>S. sp. Mg1</i>           | MYM   | negative        | 11.9                 |                       |
| 183.10     | <i>S. viridochromogenes</i> | R5M   | positive        | 7.3                  | germicidin B/C        |
| 197.12     | <i>S. viridochromogenes</i> | R5M   | positive        | 7.5                  | germicidin A          |

**Table S2:**  $^{13}\text{C}$  (176.08 MHz) and  $^1\text{H}$  NMR (700.17 MHz) data of oxohygroolidin in  $\text{DMSO-}d_6$

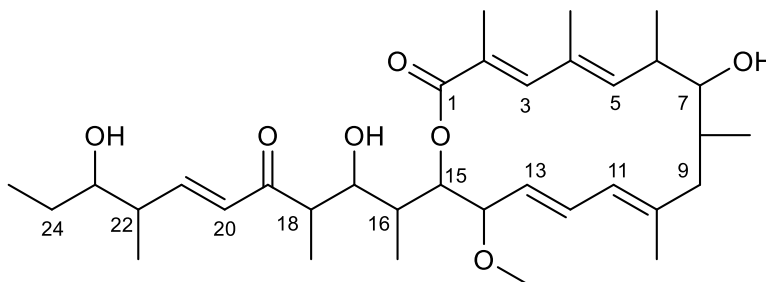

| Position | $\delta_{\text{C}}$ | $\delta_{\text{H}}$ | mult ( $J_{\text{H-H}}$ ) | Position | $\delta_{\text{C}}$ | $\delta_{\text{H}}$ | mult ( $J_{\text{H-H}}$ ) |
|----------|---------------------|---------------------|---------------------------|----------|---------------------|---------------------|---------------------------|
| 1        | 168.9               |                     |                           | 13       | 124.7               | 5.16                | dd (15.0, 7.8)            |
| 2        | 121.0               |                     |                           | 14       | 82.7                | 3.96                | m                         |
| 2-Me     | 13.1                | 1.96                | s                         | 14-OMe   | 55.1                | 3.13                | s                         |
| 3        | 145.3               | 7.13                | s                         | 15       | 74.1                | 5.10                | dd (5.8, 2.8)             |
| 4        | 132.1               |                     |                           | 16       | 39.3                | 1.82                | m                         |
| 4-Me     | 14.5                | 1.89                | s                         | 16-Me    | 11.1                | 0.86                | d (7.0)                   |
| 5        | 145.7               | 5.93                | d (8.6)                   | 17       | 70.5                | 3.65                | m                         |
| 6        | 36.8                | 2.44                | m                         | 18       | 46.0                | 2.91                | m                         |
| 6-Me     | 17.8                | 0.96                | d (7.0)                   | 18-Me    | 9.2                 | 0.97                | d (5.4)                   |
| 7        | 77.7                | 3.18                | s                         | 19       | 201.5               |                     |                           |
| 8        | 38.7                | 1.72                | m                         | 20       | 127.2               | 6.17                | dd (15.9, 0.9)            |
| 8-Me     | 22.4                | 0.88                | d (7.0)                   | 21       | 149.0               | 6.70                | dd (15.9, 8.1)            |
| 9        | 41.0                | 2.08                | m                         | 22       | 42.1                | 2.29                | m                         |
|          |                     | 1.86                | m                         | 22-Me    | 15.1                | 0.97                | d (5.4)                   |
| 10       | 141.7               |                     |                           | 23       | 73.9                | 3.24                | m                         |
| 10-Me    | 18.5                | 1.73                | s                         | 24       | 26.7                | 1.19                | m                         |
| 11       | 123.3               | 5.72                | d (11.0)                  |          |                     | 1.36                | m                         |
| 12       | 131.0               | 6.46                | dd (15.0, 11.0)           | 24-Me    | 10.0                | 0.83                | t (7.4)                   |

**Table S3:**  $^{13}\text{C}$  (176.08 MHz) and  $^1\text{H}$  NMR (700.17 MHz) data of 9-methylstreptimidone in  $\text{DMSO-}d_6$

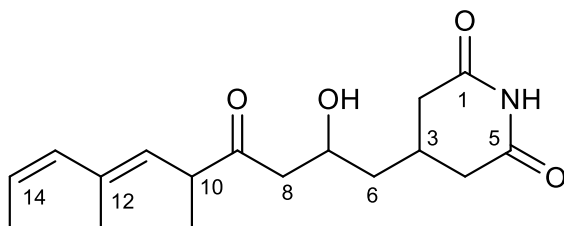

| Position | $\delta_{\text{C}}$ | $\delta_{\text{H}}$ | mult ( $J_{\text{H-H}}$ ) |
|----------|---------------------|---------------------|---------------------------|
| 1        | 173.3               |                     |                           |
| 2        | 36.9                | 2.26                | m                         |
|          |                     | 2.24                | m                         |
| 3        | 26.6                | 2.19                | m                         |
| 4        | 41.6                | 1.29                | m                         |
|          |                     | 1.35                | m                         |
| 5        | 173.2               |                     |                           |
| 6        | 38.0                | 2.17                | m                         |
|          |                     | 2.22                | m                         |
| 7        | 63.6                | 3.95                | m                         |
| 8        | 48.7                | 2.47                | m                         |
|          |                     | 2.55                | m                         |
| 9        | 209.6               |                     |                           |
| 10       | 45.7                | 3.52                | dq (9.6, 6.8)             |
| 10-Me    | 16.1                | 1.05                | d (6.8)                   |
| 11       | 129.3               | 5.16                | dm (9.6)                  |
| 12       | 134.2               |                     |                           |
| 12-Me    | 16.9                | 1.80                | dd (1.2, 0.7)             |
| 13       | 133.1               | 5.82                | dq (11.8)                 |
| 14       | 124.3               | 5.44                | dq (11.8, 7.2)            |
| 14-Me    | 14.6                | 1.74                | dd (7.2, 1.8)             |

**Table S4:**  $^{13}\text{C}$  (176.08 MHz) and  $^1\text{H}$  NMR (700.17 MHz) data of dinactin in  $\text{DMSO-}d_6$

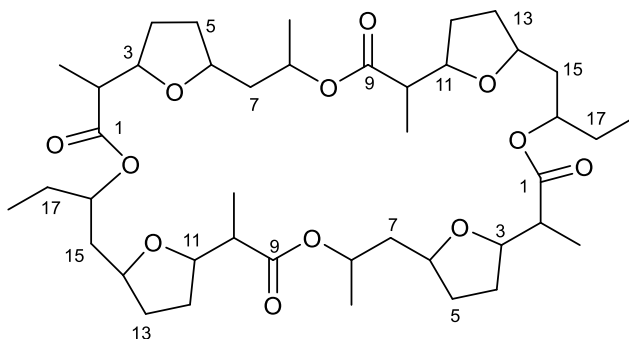

| Position | $\delta_{\text{C}}$ | $\delta_{\text{H}}$ | mult ( $J_{\text{H-H}}$ ) |
|----------|---------------------|---------------------|---------------------------|
| 1        | 173.9               |                     |                           |
| 2        | 45.1                | 2.43                | m                         |
| 3        | 80.2                | 3.89                | m                         |
| 4        | 28.1                | 1.57                | m                         |
| 5        | 31.3                | 1.95                | m                         |
| 6        | 76.0                | 3.77                | m                         |
| 7        | 42.27               | 1.72                | m                         |
|          |                     | 1.64                | m                         |
| 8        | 68.9                | 4.82                | m                         |
| 8-Me     | 20.6                | 1.16                | d (6.4)                   |
| 9        | 173.52              |                     |                           |
| 10       | 45.2                | 2.44                | m                         |
| 10-Me    | 13.3                | 0.99                | d (6.9)                   |
| 11       | 80.2                | 3.89                | m                         |
| 12       | 28.2                | 1.87                | m                         |
| 13       | 31.4                | 1.42                | m                         |
| 14       | 76.0                | 3.77                | m                         |
| 15       | 40.1                | 1.65                | td (8.0, 8.0, 2.9)        |
| 16       | 72.9                | 4.78                | m                         |
| 17       | 27.3                | 1.59                | m                         |
|          |                     | 1.48                | m                         |
| 18       | 9.6                 | 0.82                | m                         |



**Table S5.** List of genes and their functions in *S. cerevisiae*\*

| <b>Gene</b>  | <b>Function</b>                                                                                                                                                                                                                                                 |
|--------------|-----------------------------------------------------------------------------------------------------------------------------------------------------------------------------------------------------------------------------------------------------------------|
| <i>VRP1</i>  | Proline-rich actin-associated protein involved in cytoskeletal organization and cytokinesis; related to mammalian Wiskott-Aldrich syndrome protein                                                                                                              |
| <i>VPS1</i>  | Dynammin-like GTPase required for vacuolar sorting; also involved in actin cytoskeleton organization, endocytosis, late Golgi-retention of some proteins, regulation of peroxisome biogenesis                                                                   |
| <i>SMI1</i>  | Protein involved in the regulation of cell wall synthesis; proposed to be involved in coordinating cell cycle progression with cell wall integrity                                                                                                              |
| <i>UBP3</i>  | Ubiquitin-specific protease involved in transport and osmotic response; interacts with Bre5p to co-regulate anterograde and retrograde transport                                                                                                                |
| <i>GCS1</i>  | ADP-ribosylation factor GTPase activating protein (ARF GAP), involved in ER-Golgi transport; shares functional similarity with Glo3p                                                                                                                            |
| <i>DRS2</i>  | Aminophospholipid translocase (flippase) that maintains membrane lipid asymmetry in post-Golgi secretory vesicles; contributes to clathrin-coated vesicle formation and endocytosis; mutations in human homolog ATP8B1 result in liver disease                  |
| <i>VPS52</i> | Component of the GARP (Golgi-associated retrograde protein) complex, Vps51p-Vps52p-Vps53p-Vps54p, which is required for the recycling of proteins from endosomes to the late Golgi; involved in localization of actin and chitin                                |
| <i>THI22</i> | Protein with similarity to hydroxymethylpyrimidine phosphate kinases; member of a gene family with THI20 and THI21; not required for thiamine biosynthesis                                                                                                      |
| <i>KEX2</i>  | Subtilisin-like protease (proprotein convertase), a calcium-dependent serine protease involved in the activation of proproteins of the secretory pathway                                                                                                        |
| <i>MSC1</i>  | Protein of unknown function; mutant is defective in directing meiotic recombination events to homologous chromatids; the authentic, non-tagged protein is detected in highly purified mitochondria and is phosphorylated                                        |
| <i>VPS9</i>  | A guanine nucleotide exchange factor involved in vesicle-mediated vacuolar protein transport; specifically stimulates the intrinsic guanine nucleotide exchange activity of Vps21p/Rab5; similar to mammalian <i>Ras</i> inhibitors; binds ubiquitin            |
| <i>FPR3</i>  | Nucleolar peptidyl-prolyl cis-trans isomerase (PPIase); FK506 binding protein; phosphorylated by casein kinase II (Cka1p-Cka2p-Ckb1p-Ckb2p) and dephosphorylated by Ptp1p                                                                                       |
| <i>MDM30</i> | F-box component of an SCF ubiquitin protein ligase complex; associates with and is required for Fzo1p ubiquitination and for mitochondria fusion; stimulates nuclear export of specific mRNAs; promotes ubiquitin-mediated degradation of Gal4p in some strains |

\*as annotated in the *Saccharomyces* Genome Database ([www.yeastgenome.org](http://www.yeastgenome.org))
